# Supplementary material
Source: ML conference proceedings conference paper supplement (https://openreview.net/forum?id=8xTOtxinMH)
Supplement: supplementary_material [file attachment]

---

# TMT-VIS: Taxonomy-aware Multi-dataset Joint Training for Video Instance Segmentation

---

Anonymous Author(s)

Affiliation

Address

email

1 This supplementary material provides more details about the proposed TMT-VIS, further details of  
2 VIS datasets, more qualitative visual comparisons, and the codebase of our implementation. The  
3 content is organized as follows:

- 4 • More details of multiple VIS datasets.
- 5 • More ablation study experiments of the TMT-VIS.
- 6 • The qualitative visual comparisons between popular VIS method Mask2Former-VIS and TMT-VIS.
- 7 • The codebase is contained in the file ‘TMT-VIS.zip’.

## 8 1 Dataset Details

9 Here, we provide a detailed overview of various VIS datasets in Table 1. Our extensive experimental  
10 evaluations are conducted on four challenging benchmarks, namely YouTube-VIS 2019 and 2021 [7],  
11 OVIS [4], and UVO [5]. YouTube-VIS 2019 [7] was the first large-scale dataset designed for video  
12 instance segmentation, comprising 2.9K videos averaging 4.61s in duration and 27.4 frames in  
13 validation videos. YouTube-VIS 2021 [7] poses a greater challenge with longer and more complex  
14 trajectory videos, averaging 39.7 frames in validation videos. The OVIS [4] dataset is another  
15 challenging VIS dataset with 25 object categories, focusing on complex scenes with significant  
16 object occlusions. Despite containing only 607 training videos, OVIS’s videos last an average of  
17 12.77s. Lastly, the UVO [5] dataset consists of 1.2K Kinetics-400 [3] videos, densely annotated at  
18 30fps, featuring 81 object categories, including an extra “other” category for non-COCO instances. It  
19 provides exhaustive segmentation masks for all object instances in the 503 videos.

20 Among all categories in Youtube-VIS 2019, OVIS, and UVO, there are overlapping categories  
21 between each dataset, and there are also different categories that share similar semantics. The detailed  
22 overlapping categories are marked in Table 2. Overall, Youtube-VIS 2021 and OVIS share a more  
23 similar taxonomy space with Youtube-VIS 2019 than UVO, with a common category set of 34 out of  
24 40 for Youtube-VIS 2021 and 22 out of 25 for OVIS. Typically, when the taxonomy spaces of datasets  
25 are similar, training them jointly will have smaller dataset biases, which leads to a better result  
26 in performance. The characteristics of these datasets align with the improvement in performance  
27 when validating the joint-training models on various datasets: the increase is more significant on  
28 Youtube-VIS 2021 and OVIS than on UVO. Further details of some specific categories can be found  
29 in Table 4.

## 30 2 Additional Ablation Studies

31 In this section, we provide more experiments on our proposed methods, we will discuss the gener-  
32 ality and zero-shot properties of our training approach, and we will provide further details of the  
33 performance change in different taxonomies.

Table 1: Key statistics of popular VIS datasets. Note that in UVO, the majority of the videos are for Video Object Segmentation, and only 503 videos are annotated for the VIS task. ‘YTVIS’ is the acronym of ‘Youtube-VIS’.

|                  | YTVIS19 | YTVIS21 | OVIS | UVO    |
|------------------|---------|---------|------|--------|
| Videos           | 2883    | 3859    | 901  | 11228  |
| Categories       | 40      | 40      | 25   | 81     |
| Instances        | 4883    | 8171    | 5223 | 104898 |
| Masks            | 131K    | 232K    | 296K | 593K   |
| Masks per Frame  | 1.7     | 2.0     | 4.7  | 12.3   |
| Object per Video | 1.6     | 2.1     | 5.8  | 9.3    |

**Generality property.** The proposed new taxonomy-aware training strategy is an effective and general strategy that can be adapted into various DETR-based approaches (both online & offline) and into various datasets. As in Table 3, when adding our TCM&TIM strategy to the popular VIS architecture Mask2Former-VIS [1], VITA [2], and IDOL [6], we harvest performance gains on all of the three challenging benchmarks. In OVIS, the increase can be up to 6.3 AP for Mask2Former-VIS. As for the popular IDOL, our strategy can also bring about an increase of 2.8 AP in performance. This demonstrates that the proposed taxonomy-aware module can be treated as a plug-and-play design that can be used in various DETR-based VIS methods (both online & offline) across different scenarios and all popular VIS benchmarks.

**Per-category performance.** In Table 4, we present the comparison in performance between Mask2Former-VIS and our TMT-VIS on several specific taxonomies. When datasets other than YTVIS have no such taxonomy, training Mask2Former-VIS on multiple datasets will end up decreasing the performance of such category, as shown in ‘Duck’ case from Table 4. When applying our approach, we can obtain a performance improvement due to that taxonomy information of ‘Duck’ is compiled and injected to the instance queries. In other taxonomies, such as ‘Person’ which appears across all VIS datasets, the improvements are also significant.

**Zero-shot property.** Further, our TMT-VIS can also perform well on zero-shot learning. We conducted the experiments on Youtube-VIS 2019 [7], OVIS [4], and UVO [5] benchmarks. As exhibited in Table 5, TMT-VIS can be utilized to transfer the knowledge of other VIS datasets to another dataset with a significant increase of 4.5 AP and 3.8 AP respectively. The extra taxonomy information provided by our newly designed TCM & TIM improve the model’s performance when dealing with unfamiliar taxonomies.

### 3 Visualization

In the visualization comparisons between Mask2Former-VIS and our model, we select some cases under different scenarios, which include setting with multiple similar instances, setting with fast-moving objects, and setting with different poses of instance.

In Fig. 1, we demonstrate videos with multiple similar instances, and TMT-VIS can both segment and track them more accurately than Mask2Former-VIS. The swimmers or the cyclists are all instances that belong to ‘person’ category, and TMT-VIS shows better segmentation and tracking. In Fig. 2, we present example videos which have quick movements in camera’s perspective and have instances with different poses. In the top two rows, the sedan and the truck have similar appearances, and our model can distinguish and segment them with higher confidence (90% over 70%). In the last two rows, our model successfully segments the person in different poses, while Mask2Former-VIS fails to segment this person’s arm in the first frame. However, the first two rows of Fig. 2 also show that our model still have the problem of segmenting instances with heavy occlusions. This suggests that simply combining taxonomy information is insufficient of solving severely occluded scenes, and that more information should be aggregated to instance queries to make the model more robust in segmenting instances.

Table 2: Overlapping categories of multiple VIS datasets with Youtube-VIS 2019 dataset. ‘YTVIS’ is the acronym of ‘Youtube-VIS’. As demonstrated in the table, YTVIS2021 and OVIS have a more similar taxonomy space, with 34 and 22 overlapping categories respectively.

| YTVIS19_40_categories  | YTVIS21_40_categories | OVIS_25_categories | UVO_81_categories |
|------------------------|-----------------------|--------------------|-------------------|
| Overlapping Categories | 34                    | 22                 | 19                |
| Person                 | ✓                     | ✓                  | ✓                 |
| Giant_panda            | ✓                     | ✓                  |                   |
| Lizard                 | ✓                     | ✓                  |                   |
| Parrot                 | ✓                     | ✓                  |                   |
| Skateboard             | ✓                     |                    | ✓                 |
| Sedan                  |                       | ✓                  | ✓                 |
| Ape                    |                       |                    |                   |
| Dog                    | ✓                     | ✓                  | ✓                 |
| Snake                  | ✓                     |                    |                   |
| Monkey                 | ✓                     | ✓                  |                   |
| Hand                   |                       |                    |                   |
| Rabbit                 | ✓                     | ✓                  |                   |
| Duck                   | ✓                     |                    |                   |
| Cat                    | ✓                     | ✓                  | ✓                 |
| Cow                    | ✓                     | ✓                  | ✓                 |
| Fish                   | ✓                     | ✓                  |                   |
| Train                  | ✓                     |                    | ✓                 |
| Horse                  | ✓                     | ✓                  | ✓                 |
| Turtle                 | ✓                     | ✓                  |                   |
| Bear                   | ✓                     | ✓                  | ✓                 |
| Motorbike              | ✓                     | ✓                  | ✓                 |
| Giraffe                | ✓                     | ✓                  | ✓                 |
| Leopard                | ✓                     |                    |                   |
| Fox                    | ✓                     |                    |                   |
| Deer                   | ✓                     |                    |                   |
| Owl                    |                       |                    |                   |
| Surfboard              |                       |                    | ✓                 |
| Airplane               | ✓                     | ✓                  | ✓                 |
| Truck                  | ✓                     | ✓                  | ✓                 |
| Zebra                  | ✓                     | ✓                  | ✓                 |
| Tiger                  | ✓                     | ✓                  |                   |
| Elephant               | ✓                     | ✓                  | ✓                 |
| Snowboard              | ✓                     |                    | ✓                 |
| Boat                   | ✓                     | ✓                  | ✓                 |
| Shark                  | ✓                     |                    |                   |
| Mouse                  | ✓                     |                    |                   |
| Frog                   | ✓                     |                    |                   |
| Eagle                  |                       |                    |                   |
| Earless_seal           | ✓                     |                    |                   |
| Tennis_racket          | ✓                     |                    | ✓                 |

Table 3: Ablation study on the generality property of TCM/TIM design with ResNet-50 backbone on multiple datasets.

| Datasets         | Method          | AP           | AP <sub>50</sub> | AP <sub>75</sub> |
|------------------|-----------------|--------------|------------------|------------------|
| YouTube-VIS 2019 | Mask2Former-VIS | 46.4         | 68.0             | 50.0             |
|                  | + TCM/TIM       | 49.7 (↑ 3.3) | 73.4 (↑ 5.4)     | 53.9 (↑ 3.9)     |
|                  | VITA            | 49.8         | 72.6             | 54.5             |
|                  | + TCM/TIM       | 52.6 (↑ 2.8) | 74.4 (↑ 1.8)     | 57.6 (↑ 3.1)     |
|                  | IDOL            | 49.5         | 74.0             | 52.9             |
|                  | + TCM/TIM       | 51.4 (↑ 1.9) | 74.9 (↑ 0.9)     | 55.0 (↑ 2.1)     |
| YouTube-VIS 2021 | Mask2Former-VIS | 40.6         | 60.9             | 41.8             |
|                  | + TCM/TIM       | 44.9 (↑ 4.3) | 66.1 (↑ 5.2)     | 48.5 (↑ 6.7)     |
|                  | VITA            | 45.7         | 67.4             | 49.5             |
|                  | + TCM/TIM       | 48.3 (↑ 2.6) | 69.8 (↑ 2.4)     | 50.8 (↑ 1.3)     |
|                  | IDOL            | 43.9         | 68.0             | 49.6             |
|                  | + TCM/TIM       | 45.8 (↑ 1.9) | 69.2 (↑ 1.2)     | 50.9 (↑ 1.3)     |
| OVIS             | Mask2Former-VIS | 16.5         | 36.5             | 14.6             |
|                  | + TCM/TIM       | 22.8 (↑ 6.3) | 43.6 (↑ 7.1)     | 21.7 (↑ 7.1)     |
|                  | VITA            | 19.6         | 41.2             | 17.4             |
|                  | + TCM/TIM       | 25.1 (↑ 5.5) | 45.9 (↑ 4.7)     | 23.8 (↑ 6.4)     |
|                  | IDOL            | 30.2         | 51.3             | 30.0             |
|                  | + TCM/TIM       | 33.0 (↑ 2.8) | 55.7 (↑ 4.4)     | 33.2 (↑ 3.2)     |

Table 4: Comparisons between per-category performance of Mask2Former-VIS and TMT-VIS. ‘MDT’ refers to ‘Multiple Datasets Training’, indicating whether the approach is trained on YTVIS, OVIS, and UVO. ‘In Corresponding Dataset’ is used to demonstrate whether the category is contained in corresponding dataset.

| Categories | Methods         | In Corresponding Dataset |      |     | MDT | Test Set | AP           |
|------------|-----------------|--------------------------|------|-----|-----|----------|--------------|
|            |                 | YTVIS                    | OVIS | UVO |     |          |              |
| Person     | Mask2Former-VIS | ✓                        |      |     |     | YTVIS    | 57.2         |
|            | TMT-VIS         | ✓                        |      |     |     | YTVIS    | 57.9 (↑ 0.7) |
|            | Mask2Former-VIS | ✓                        | ✓    | ✓   | ✓   | YTVIS    | 59.3         |
|            | TMT-VIS         | ✓                        | ✓    | ✓   | ✓   | YTVIS    | 60.7 (↑ 1.4) |
| Duck       | Mask2Former-VIS | ✓                        |      |     |     | YTVIS    | 41.6         |
|            | TMT-VIS         | ✓                        |      |     |     | YTVIS    | 42.4 (↑ 0.8) |
|            | Mask2Former-VIS | ✓                        |      |     | ✓   | YTVIS    | 38.3         |
|            | TMT-VIS         | ✓                        |      |     | ✓   | YTVIS    | 43.9 (↑ 5.6) |
| Monkey     | Mask2Former-VIS | ✓                        |      |     |     | YTVIS    | 24.7         |
|            | TMT-VIS         | ✓                        |      |     |     | YTVIS    | 26.4 (↑ 1.7) |
|            | Mask2Former-VIS | ✓                        | ✓    |     | ✓   | YTVIS    | 25.6         |
|            | TMT-VIS         | ✓                        | ✓    |     | ✓   | YTVIS    | 29.1 (↑ 3.5) |
| Snowboard  | Mask2Former-VIS | ✓                        |      |     |     | YTVIS    | 8.9          |
|            | TMT-VIS         | ✓                        |      |     |     | YTVIS    | 11.8 (↑ 2.9) |
|            | Mask2Former-VIS | ✓                        |      | ✓   | ✓   | YTVIS    | 10.0         |
|            | TMT-VIS         | ✓                        |      | ✓   | ✓   | YTVIS    | 14.5 (↑ 4.5) |

Table 5: Zero-shot Performance of TMT-VIS with ResNet-50 backbone. The results demonstrate the zero-shot ability of our proposed method. YouTube-VIS 2019 is abbreviated as ‘YTVIS’.

| Method          | Train Set |      |     | Test Set | AP           | AP <sub>50</sub> | AP <sub>75</sub> |
|-----------------|-----------|------|-----|----------|--------------|------------------|------------------|
|                 | YTVIS     | OVIS | UVO |          |              |                  |                  |
| Mask2Former-VIS |           | ✓    | ✓   | YTVIS    | 7.1          | 11.4             | 8.3              |
| TMT-VIS         |           | ✓    | ✓   | YTVIS    | 11.6 (↑ 4.5) | 17.2 (↑ 5.8)     | 15.0 (↑ 6.7)     |
| Mask2Former-VIS | ✓         |      | ✓   | OVIS     | 3.7          | 9.8              | 5.2              |
| TMT-VIS         | ✓         |      | ✓   | OVIS     | 7.5 (↑ 3.8)  | 14.1 (↑ 4.3)     | 8.5 (↑ 3.3)      |

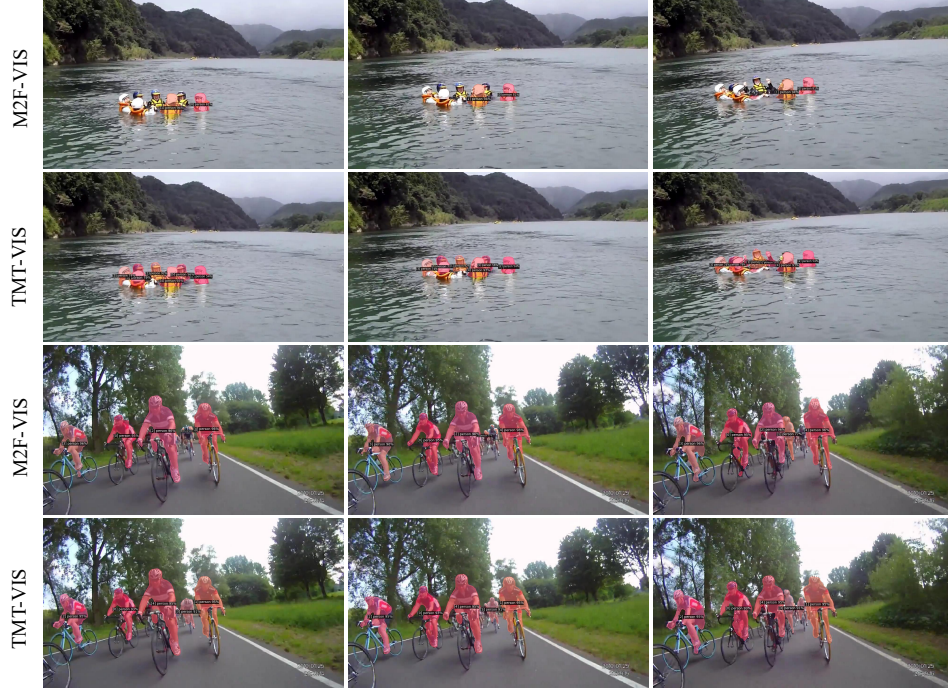

Figure 1: Visual comparison of our model with Mask2Former-VIS (abbreviated as ‘M2F-VIS’). Our TMT-VIS shows better precision in segmenting and tracking small instances with the same taxonomy (The swimmers or the cyclists are all in ‘person’ category, and TMT-VIS shows better performance).

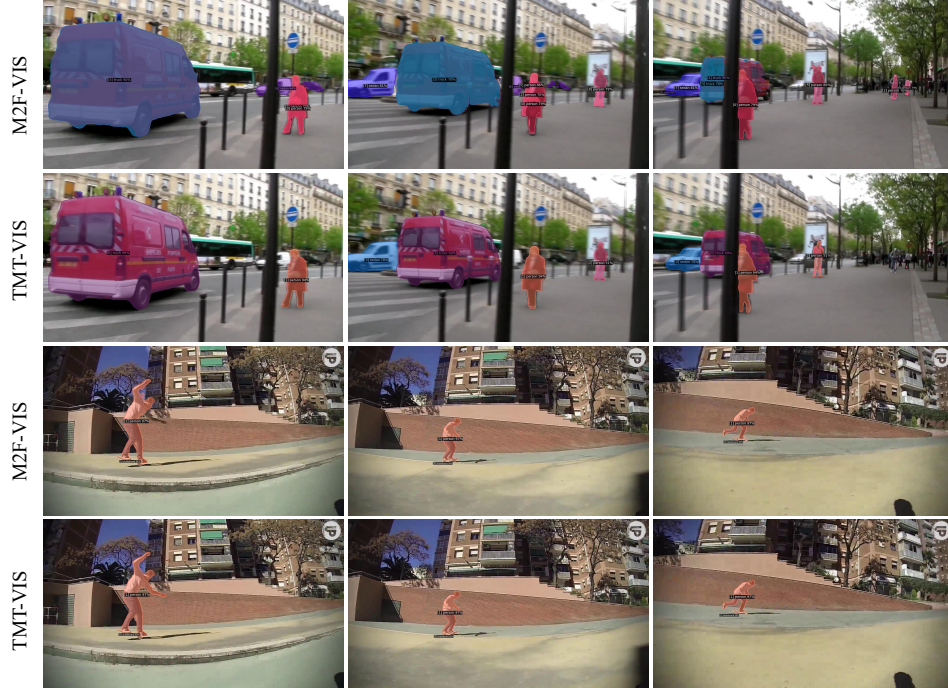

Figure 2: Visual comparison of our model with Mask2Former-VIS (abbreviated as ‘M2F-VIS’). Our TMT-VIS shows better precision in segmenting and tracking instances with quick movements or with different poses. In the top two rows, the sedan and the truck have similar appearances, and our model can classify them with higher confidence. In the last two rows, our model successfully segments the person in different poses, while M2F-VIS fails to segment this person’s arm in the first frame.

## 72 References

- 73 [1] Bowen Cheng, Ishan Misra, Alexander G Schwing, Alexander Kirillov, and Rohit Girdhar. Masked-attention  
74 mask transformer for universal image segmentation. In *CVPR*, 2022. 2
- 75 [2] Miran Heo, Sukjun Hwang, Seoung Wug Oh, Joon-Young Lee, and Seon Joo Kim. Vita: Video instance  
76 segmentation via object token association. In *NeurIPS*, 2022. 2
- 77 [3] Will Kay, Joao Carreira, Karen Simonyan, Brian Zhang, Chloe Hillier, Sudheendra Vijayanarasimhan,  
78 Fabio Viola, Tim Green, Trevor Back, Paul Natsev, et al. The kinetics human action video dataset.  
79 *arXiv:1705.06950*, 2017. 1
- 80 [4] Jiyang Qi, Yan Gao, Yao Hu, Xinggang Wang, Xiaoyu Liu, Xiang Bai, Serge Belongie, Alan Yuille,  
81 Philip HS Torr, and Song Bai. Occluded video instance segmentation: A benchmark. *IJCV*, 2022. 1, 2
- 82 [5] Weiyao Wang, Matt Feiszli, Heng Wang, and Du Tran. Unidentified video objects: A benchmark for dense,  
83 open-world segmentation. In *ICCV*, 2021. 1, 2
- 84 [6] Junfeng Wu, Qihao Liu, Yi Jiang, Song Bai, Alan Yuille, and Xiang Bai. In defense of online models for  
85 video instance segmentation. In *ECCV*, 2022. 2
- 86 [7] Linjie Yang, Yuchen Fan, and Ning Xu. Video instance segmentation. In *ICCV*, 2019. 1, 2
